# Supplementary material for: Effects of whole-brain radiation therapy on the blood–brain barrier in immunocompetent and immunocompromised mouse models
Source: PubMed Central journal article supplement (PMC9896731; doi:10.1186/s13014-023-02215-6), 2023-02-03

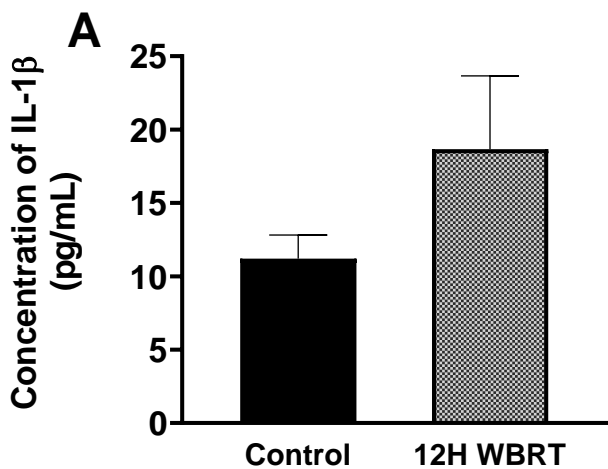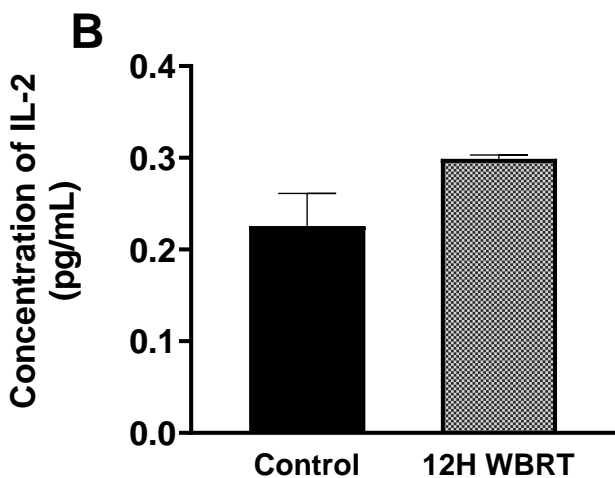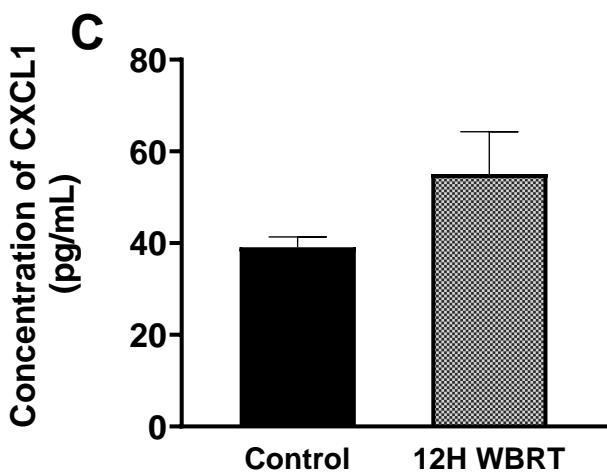

Supplement: 13014_2023_2215_MOESM5_ESM.pdf [file 13014_2023_2215_MOESM5_ESM.pdf]
